# Supplementary material
Source: publisher figshare collection journal article supplement (https://gsajournals.figshare.com/ndownloader/files/13990889)

## Supplemental material

### Supplemental figure legends

#### **Figure S1: *Drosophila* Rnf146/Iduna targets Tnks substrates for degradation *in vivo*.**

(A-C) Third instar larval eye imaginal discs containing *Rnf146*<sup>36</sup> null mutant clones marked by the absence of GFP (-/-; magenta) were stained with indicated antibodies. Proteins modified by poly-ADP-ribose accumulate cell autonomously in *Rnf146*<sup>36</sup> mutant clones.

#### **Figure S2: *Drosophila* Rnf146 mediates pADPr-directed destabilization of Axin and Tnks *in vivo*.**

(A) Immunoblot of lysates from wild-type and *Rnf146* null mutant embryos collected at indicated stages probed with Tnks or Axin antibody. Tnks and Axin protein levels are increased in *Rnf146* mutant embryos. Kinesin was used as a loading control. (B-D) Third instar larval eye imaginal discs containing *Rnf146*<sup>36</sup> null mutant clones marked by the absence of GFP (-/-; magenta) were stained with indicated antibodies. Tnks accumulates cell autonomously in *Rnf146*<sup>36</sup> null mutant clones.

#### **Figure S3: An *in vivo* analysis of domains required for Tnks-dependent degradation of Axin.**

Confocal images of third instar larval wing imaginal discs expressing indicated Axin-V5 transgenes with the *71B-Gal4* driver, which drives expression in the dorsal and ventral regions of the pouch of third instar larval wing imaginal discs. Axin mutants were stained with V5 antibody (green). *Tnks* mutant clones were marked by the lack of  $\beta$ -gal staining (magenta). The levels of Axin $\Delta$ RGS (A-C) and Axin $\Delta$ Arm (D-F) increase in *Tnks* mutant clones compared with neighboring wild-type cells. The levels of Axin $\Delta$ PP2A (G-L) and Axin $\Delta$ DIX (M-R) increase in some, but not all cells within *Tnks* mutant clones compared with neighboring wild-type cells.

#### **Figure S4: An *in vivo* analysis of domains required for Rnf146-dependent degradation of Axin.**

Confocal images of third instar larval wing imaginal discs expressing indicated Axin transgenes with the *C765-Gal4* driver, which drives expression in the dorsal and ventral regions of the pouch of third instar larval wing imaginal discs. Axin mutants were stained with V5 antibody (green). *Rnf146* mutant clones were marked by the lack of GFP staining (magenta). The levels of Axin $\Delta$ RGS (A-C) and Axin $\Delta$ Arm (D-F) increase in *Rnf146* mutant clones compared with neighboring wild-type cells. The levels of Axin $\Delta$ PP2A (G-L) and Axin $\Delta$ DIX (M-R) increase in some, but not all cells within *Rnf146* mutant clones compared with neighboring wild-type cells.

**Figure S5: In contrast with *Tnks*, *Rnf146* is dispensable for regulation of progenitor cell number in the adult midgut.** Confocal images from midguts of 14 day old adults, genotypes indicated on top: *Tnks*<sup>19/503</sup> and *Rnf146*<sup>36/157</sup>. Progenitor cells are marked by *esg-Gal4*, *UAS-GFP* (*esg-GFP*) stained with anti-GFP (green) and nuclei are marked with DAPI (blue). The difference in progenitor cell number between control (A) and *Rnf146* mutant midguts (B) is insignificant (Fig. 5), whereas the number of progenitor cells is increased in *Tnks* mutant midguts (C).

**Figure S1**

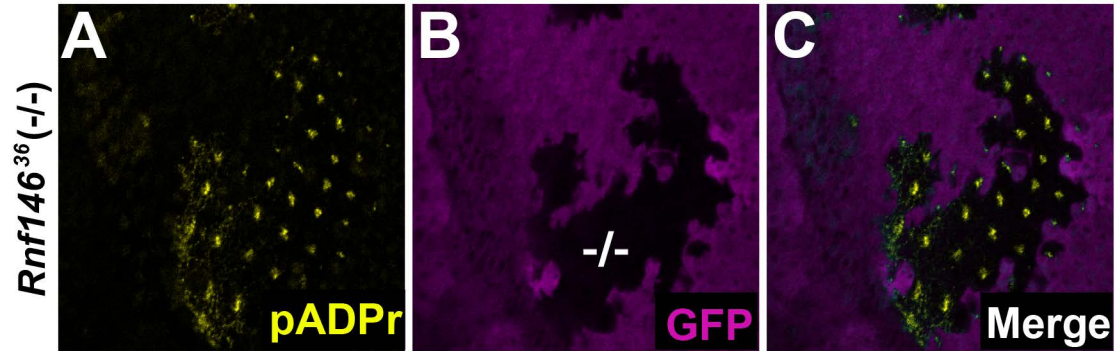

**Figure S2**

**A**

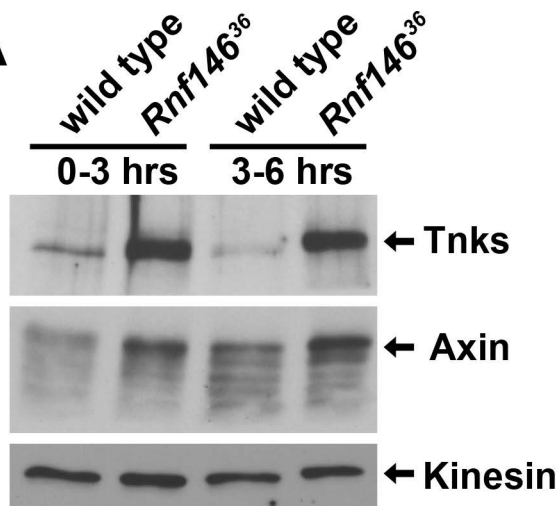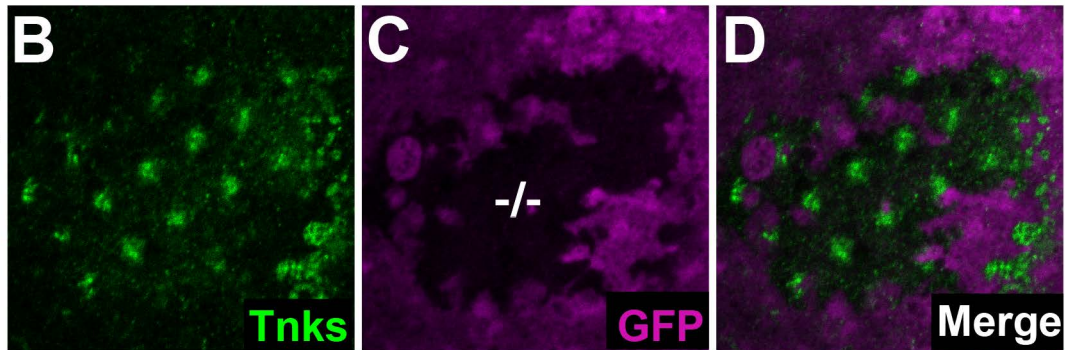



**Figure S3**

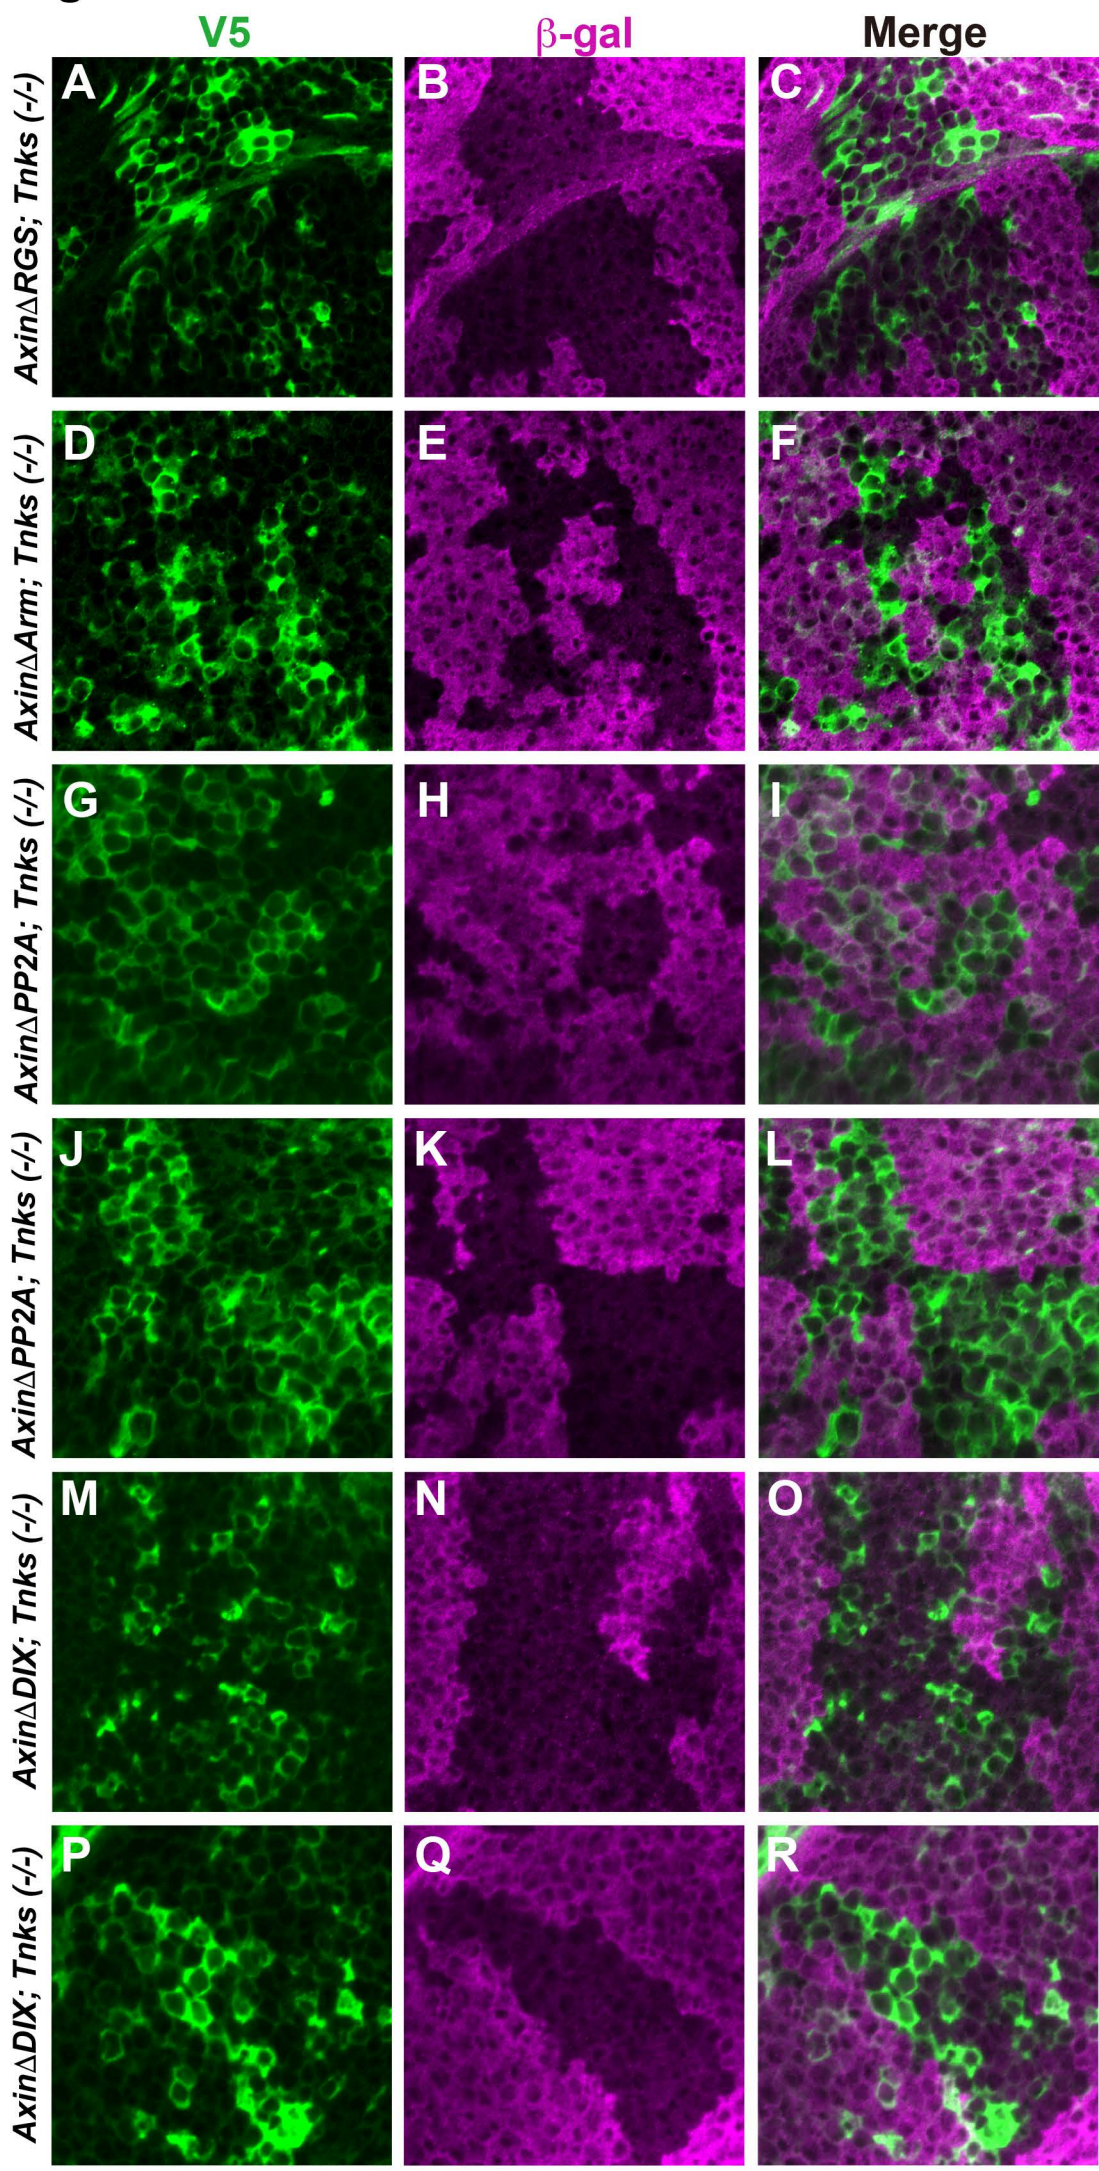



**Figure S4**

**V5**

**GFP**

**Merge**

*Axin* $\Delta$ RGS; *Rnf146* (-/-)

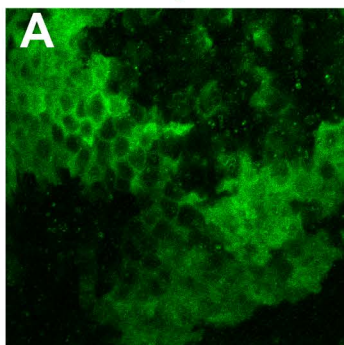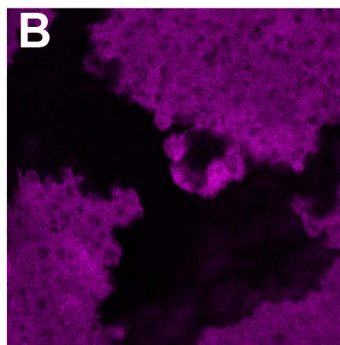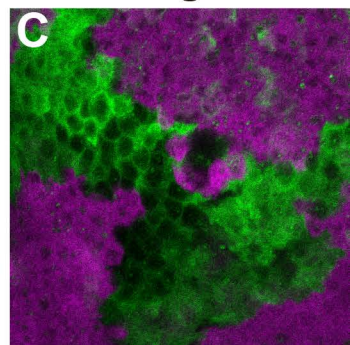

*Axin* $\Delta$ Arm; *Rnf146* (-/-)

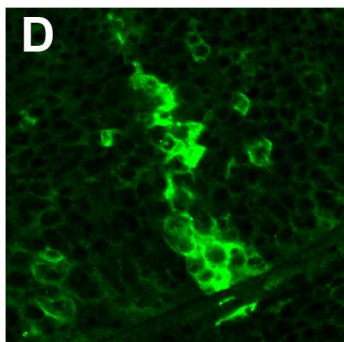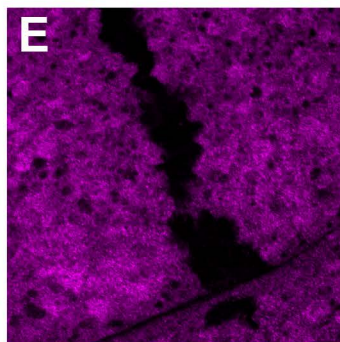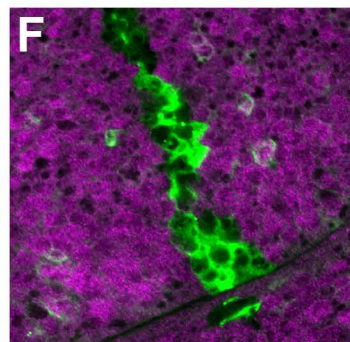

*Axin* $\Delta$ PP2A; *Rnf146* (-/-)

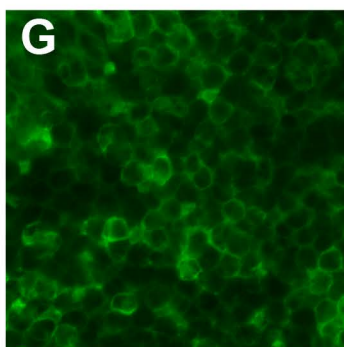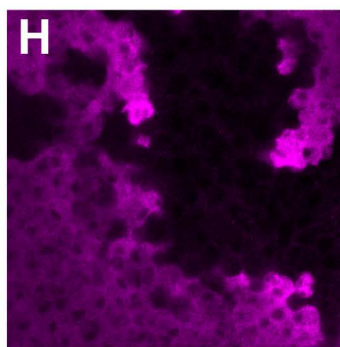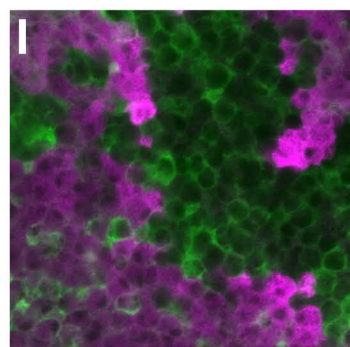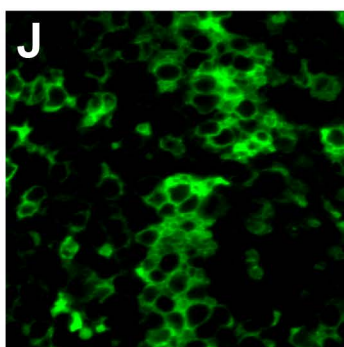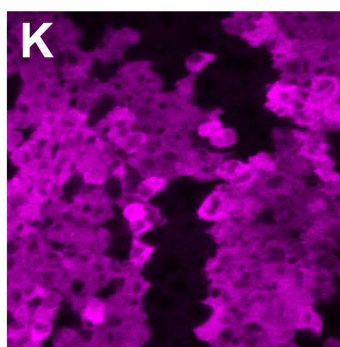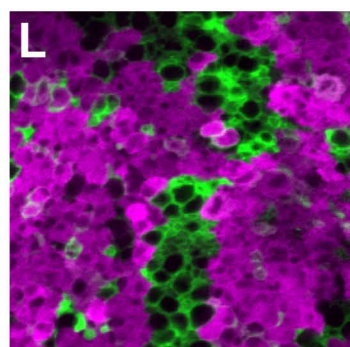

*Axin* $\Delta$ DIX; *Rnf146* (-/-)

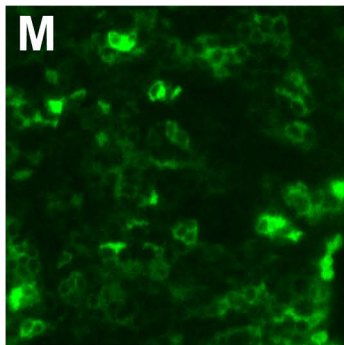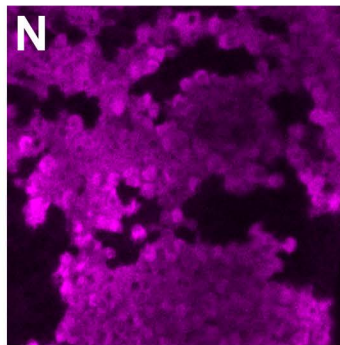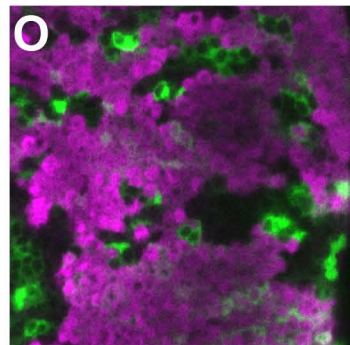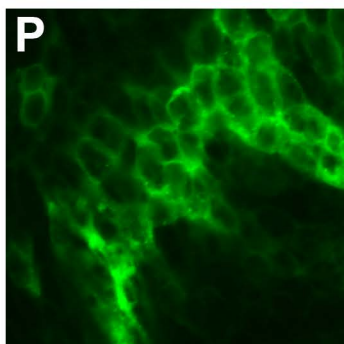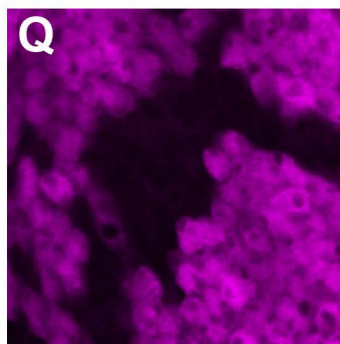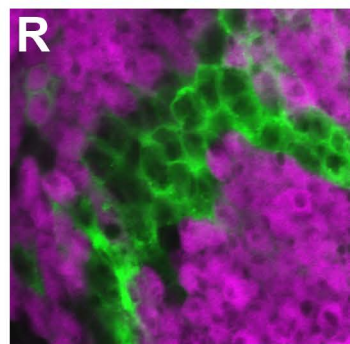

**Figure S5**

*control*

*Rnf146*

*Tnks*

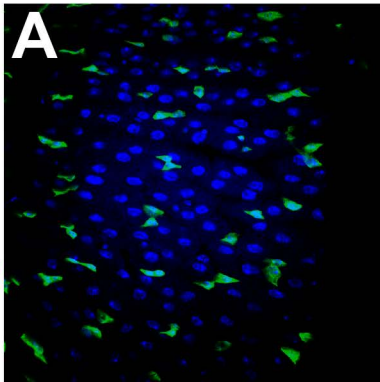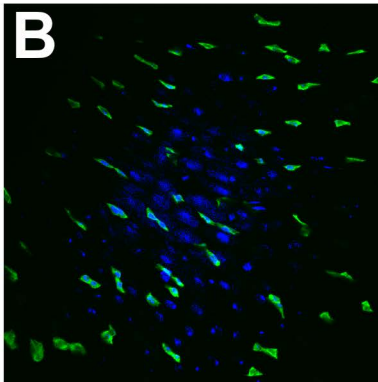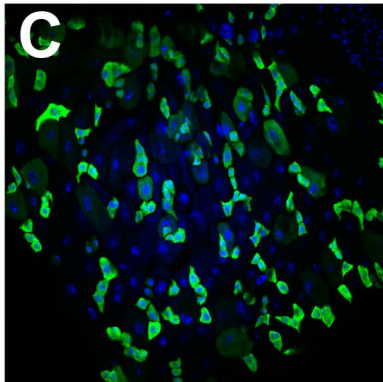

Supplement: Supplementary file 1 [file 13990889]
